# Supplementary material for: Structural and evolutionary divergence of eukaryotic protein kinases in Apicomplexa
Source: Springer Nature journal article supplement (doi:10.1186/1471-2148-11-321), 2011-11-02
Supplement: Additional file 5 [file 1471-2148-11-321-s5.pdf]

Apicomplexan CDK subfamily vs. eukaryotic CDC2

**Intermediate**

|     |                                        |     |                                                |     |
|-----|----------------------------------------|-----|------------------------------------------------|-----|
| 1   | XXXVERLGGGTYGDVYKAV                    | E   | YYY                                            | 23* |
| 24  | ---EKLGGGTYGDVYKGVikynnnnnndlyqntnylpy | D   | YYT                                            | 64  |
| 24  | ---EKLGGGTYGDVYKGVikynnnnnndlyqntnylpy | D   | YYT                                            | 63  |
| 24  | ---EKLGGGTYGDVYKGVikysnssndlyqntnylpy  | D   | YYT                                            | 63  |
| 24  | ---EKLGGGTYGDVYKGV                     | V   | VKY                                            | 42  |
| 24  | ---EKLGGGTYGDVYKGV                     | V   | VKY                                            | 42  |
| 24  | ---EKLGGGTYGDVYKGV                     | V   | VKY                                            | 42  |
| 131 | -----                                  | --- | ---                                            | 42  |
| 131 | -----                                  | --- | ---                                            | --- |
| 127 | -----                                  | --- | ---                                            | --- |
| 34  | ---VERLGGGTYGDVYKAV                    | E   | EeeeeendrgsarardrpgistaeataeatngedasakegsekKTK | 95  |
| 34  | ---VERLGGGTYGDVYKAV                    | E   | EeeeeendrgsarardrpgistaeataeatngedasakegsekKTK | 95  |
| 34  | ---VERLGGGTYGDVYKAV                    | E   | EeeeeendrgsarardrpgistaeataeatngedasakegsekKTK | 95  |
| 34  | ---VERLGGGTYGDVYKAV                    | E   | EEDeenqrgassslsasrdgasdgggrnveetpekegea        | 90  |
| 34  | ---VERLGGGTYGDVYRAV                    | E   | EPedgvgg                                       | 58  |

position . 10 . 20

**Background**

|     |                                        |     |                                                |     |
|-----|----------------------------------------|-----|------------------------------------------------|-----|
| 1   | XXXVERLGGGTYGDVYKAV                    | E   | YYY                                            | 23* |
| 24  | ---EKLGGGTYGDVYKGVikynnnnnndlyqntnylpy | D   | YYT                                            | 64  |
| 24  | ---EKLGGGTYGDVYKGVikynnnnnndlyqntnylpy | D   | YYT                                            | 63  |
| 24  | ---EKLGGGTYGDVYKGVikysnssndlyqntnylpy  | D   | YYT                                            | 63  |
| 24  | ---EKLGGGTYGDVYKGV                     | V   | VKY                                            | 42  |
| 24  | ---EKLGGGTYGDVYKGV                     | V   | VKY                                            | 42  |
| 24  | ---EKLGGGTYGDVYKGV                     | V   | VKY                                            | 42  |
| 131 | -----                                  | --- | ---                                            | 42  |
| 131 | -----                                  | --- | ---                                            | --- |
| 127 | -----                                  | --- | ---                                            | --- |
| 34  | ---VERLGGGTYGDVYKAV                    | E   | EeeeeendrgsarardrpgistaeataeatngedasakegsekKTK | 95  |
| 34  | ---VERLGGGTYGDVYKAV                    | E   | EeeeeendrgsarardrpgistaeataeatngedasakegsekKTK | 95  |
| 34  | ---VERLGGGTYGDVYKAV                    | E   | EeeeeendrgsarardrpgistaeataeatngedasakegsekKTK | 95  |
| 34  | ---VERLGGGTYGDVYKAV                    | E   | EEDeenqrgassslsasrdgasdgggrnveetpekegea        | 90  |
| 34  | ---VERLGGGTYGDVYRAV                    | E   | EPedgvgg                                       | 58  |

**foreground (63):**

|   |   |   |   |   |   |   |   |   |   |   |   |   |   |   |   |   |   |   |   |   |
|---|---|---|---|---|---|---|---|---|---|---|---|---|---|---|---|---|---|---|---|---|
| Y | E | K | I | E | V | G | E | T | Y | G | V | Y | K | A | V | Q | N | K | Q | T |
| F | T | L | L | S | S | E | I | E | R | G | T |   |   |   |   |   | D | T | E |   |
| I |   |   |   | A | K | C | R |   |   |   |   |   |   |   |   |   | R |   |   |   |

**wt\_res\_freqs (23):**

|   |   |   |   |   |   |   |   |   |   |   |   |   |   |   |   |   |   |   |   |   |
|---|---|---|---|---|---|---|---|---|---|---|---|---|---|---|---|---|---|---|---|---|
| 6 | 1 | 3 | 2 | 3 | 4 | 1 | 8 | 5 | 5 | 7 | 9 | 2 | 8 | 5 | 5 | 1 | 1 | 2 | 2 | 5 |
| 1 | 1 | 1 | 1 | 1 | 1 | 1 | 1 | 1 | 1 | 1 | 1 | 1 | 1 | 1 | 1 | 1 | 1 | 1 | 1 | 1 |

**insertions** 1 3  
**deletions** 9 766

position . 10 . 20

**Foreground**

|     |                                        |     |                                                |     |
|-----|----------------------------------------|-----|------------------------------------------------|-----|
| 1   | XXXVERLGGGTYGDVYKAV                    | E   | YYY                                            | 23* |
| 24  | ---EKLGGGTYGDVYKGVikynnnnnndlyqntnylpy | D   | YYT                                            | 64  |
| 24  | ---EKLGGGTYGDVYKGVikynnnnnndlyqntnylpy | D   | YYT                                            | 63  |
| 24  | ---EKLGGGTYGDVYKGVikysnssndlyqntnylpy  | D   | YYT                                            | 63  |
| 24  | ---EKLGGGTYGDVYKGV                     | V   | VKY                                            | 42  |
| 24  | ---EKLGGGTYGDVYKGV                     | V   | VKY                                            | 42  |
| 24  | ---EKLGGGTYGDVYKGV                     | V   | VKY                                            | 42  |
| 131 | -----                                  | --- | ---                                            | 42  |
| 131 | -----                                  | --- | ---                                            | --- |
| 127 | -----                                  | --- | ---                                            | --- |
| 34  | ---VERLGGGTYGDVYKAV                    | E   | EeeeeendrgsarardrpgistaeataeatngedasakegsekKTK | 95  |
| 34  | ---VERLGGGTYGDVYKAV                    | E   | EeeeeendrgsarardrpgistaeataeatngedasakegsekKTK | 95  |
| 34  | ---VERLGGGTYGDVYKAV                    | E   | EeeeeendrgsarardrpgistaeataeatngedasakegsekKTK | 95  |
| 34  | ---VERLGGGTYGDVYKAV                    | E   | EEDeenqrgassslsasrdgasdgggrnveetpekegea        | 90  |
| 34  | ---VERLGGGTYGDVYRAV                    | E   | EPedgvgg                                       | 58  |

**foreground (15):**

|   |   |   |   |   |   |   |   |   |   |   |   |   |   |   |  |  |   |   |   |
|---|---|---|---|---|---|---|---|---|---|---|---|---|---|---|--|--|---|---|---|
| V | E | K | L | G | G | T | Y | G | D | V | Y | K | G | K |  |  | D | E | T |
| R |   |   |   |   |   |   |   |   |   |   |   |   |   |   |  |  | V | P |   |
|   |   |   |   |   |   |   |   |   |   |   |   |   |   |   |  |  | E | Y |   |

**wt\_res\_freqs (3):**

|   |   |   |   |   |   |   |   |   |   |   |   |   |   |   |   |   |   |   |   |
|---|---|---|---|---|---|---|---|---|---|---|---|---|---|---|---|---|---|---|---|
| 3 | 7 | 7 | 7 | 7 | 7 | 7 | 7 | 7 | 7 | 7 | 7 | 7 | 7 | 7 | 7 | 7 | 6 | 3 | 3 |
| 3 | 1 | 1 | 1 | 1 | 1 | 1 | 1 | 1 | 1 | 1 | 1 | 1 | 1 | 1 | 1 | 1 | 1 | 1 | 1 |

**insertions** 2  
**deletions** 2 222

position . 10 . 20

















**Intermediate**

|         |     |          |      |
|---------|-----|----------|------|
| unknown | 279 | ALSHQWF  | 285* |
| unknown | 493 | ALSHPWTF | 499  |
| unknown | 526 | ALSHPWTF | 532  |
| unknown | 587 | ALSHPWTF | 593  |
| unknown | 494 | ALSHPWTF | 500  |
| unknown | 502 | ALSHPWTF | 508  |
| unknown | 509 | ALSHPWTF | 515  |
| unknown | 451 | ALSHRWTF | 457  |
| unknown | 402 | ALSHKWF  | 408  |
| unknown | 464 | ALSHPWTF | 470  |
| unknown | 446 | ALSHQWF  | 452  |
| unknown | 446 | ALSHQWF  | 452  |
| unknown | 446 | ALSHQWF  | 452  |
| unknown | 451 | ALSHQWF  | 457  |
| unknown | 339 | -----    |      |

**position** .

**Background**

|                |     |          |      |
|----------------|-----|----------|------|
| consensus      | 279 | ALSHQWF  | 285* |
| PFF0750w       | 493 | ALSHPWTF | 499  |
| PKH_113350     | 526 | ALSHPWTF | 532  |
| PVX_113910     | 587 | ALSHPWTF | 593  |
| PBANKA_123020  | 494 | ALSHPWTF | 500  |
| PY06538        | 502 | ALSHPWTF | 508  |
| PCHAS_123090   | 509 | ALSHPWTF | 515  |
| TA09960        | 451 | ALSHRWTF | 457  |
| TP04_0791      | 402 | ALSHKWF  | 408  |
| BBOV_III008880 | 464 | ALSHPWTF | 470  |
| TGGT1_118720   | 446 | ALSHQWF  | 452  |
| TGME49_029020  | 446 | ALSHQWF  | 452  |
| TGVEG_026470   | 446 | ALSHQWF  | 452  |
| NCLIV_030060   | 451 | ALSHQWF  | 457  |
| ETH_00023650   | 339 | -----    |      |

**foreground (63):** ALSHNPWF 6.0  
L QD FL  
K Y

**wt\_res\_freqs (23):** 7816616  
1 11 21  
1 4

**insertions**  
**deletions** 6667111 9.1

**Foreground**

|                |     |          |      |
|----------------|-----|----------|------|
| consensus      | 279 | ALSHQWF  | 285* |
| PFF0750w       | 493 | ALSHPWTF | 499  |
| PKH_113350     | 526 | ALSHPWTF | 532  |
| PVX_113910     | 587 | ALSHPWTF | 593  |
| PBANKA_123020  | 494 | ALSHPWTF | 500  |
| PY06538        | 502 | ALSHPWTF | 508  |
| PCHAS_123090   | 509 | ALSHPWTF | 515  |
| TA09960        | 451 | ALSHRWTF | 457  |
| TP04_0791      | 402 | ALSHKWF  | 408  |
| BBOV_III008880 | 464 | ALSHPWTF | 470  |
| TGGT1_118720   | 446 | ALSHQWF  | 452  |
| TGME49_029020  | 446 | ALSHQWF  | 452  |
| TGVEG_026470   | 446 | ALSHQWF  | 452  |
| NCLIV_030060   | 451 | ALSHQWF  | 457  |
| ETH_00023650   | 339 | -----    |      |

**foreground (15):** ALSHNPWF 0.9  
P

**wt\_res\_freqs (3):** 8888288  
4

**insertions**  
**deletions** 6666666 2.3

**position** .
