# Supplementary material for: Structural and evolutionary divergence of eukaryotic protein kinases in Apicomplexa
Source: Springer Nature journal article supplement (doi:10.1186/1471-2148-11-321), 2011-11-02
Supplement: Additional file 9 [file 1471-2148-11-321-s9.pdf]

# αC helix

# activation loop

|                 | *                 | DFG       |         | *     | APE             |
|-----------------|-------------------|-----------|---------|-------|-----------------|
| CpCDPK2         | VDRFKQEIEIMKSL... | DFGLAARF  | - - - - | KPGKM | MMRTKVGTPYYVSPQ |
| PfCDPK5         | IERLKREILIMKQM... | DWGFASKC  | - - - - | MNNHN | LKSVVGTPYYIAPE  |
| HsMAPK3-ERK1    | CQRTLREIQILLRF... | DFGLARI A | DPEHD   | HTGF  | LTEYVATRWRAP E  |
| HsMAPK8-JNK1-α2 | AKRAYRELVLKCV...  | DFGLART A | - - - - | GTSFM | MTPYVVTRYR APE  |
| HsMAPK14-p38    | AKRTYRELRLLKHM... | DFGLAR    | - - - - | HTDDE | MTGYVATRWRAP E  |

TxY

GUIDANCE SCORE

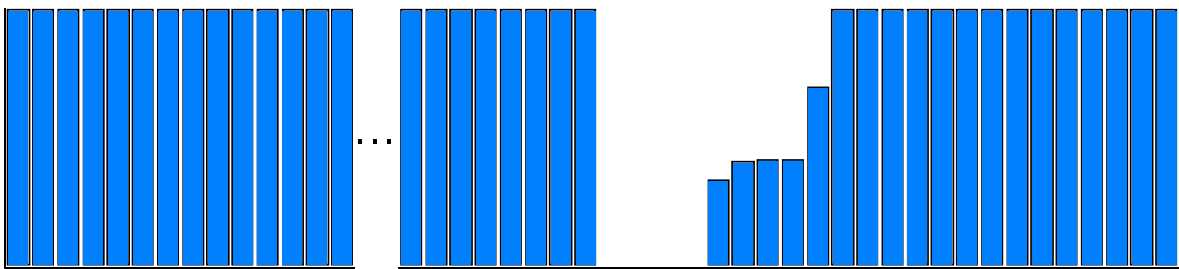

**Legend:**

|           |   |   |   |   |   |   |   |   |      |           |  |  |  |  |  |  |  |  |                   |  |  |  |  |  |  |  |  |
|-----------|---|---|---|---|---|---|---|---|------|-----------|--|--|--|--|--|--|--|--|-------------------|--|--|--|--|--|--|--|--|
| 9         | 8 | 7 | 6 | 5 | 4 | 3 | 2 | 1 |      |           |  |  |  |  |  |  |  |  |                   |  |  |  |  |  |  |  |  |
| Confident |   |   |   |   |   |   |   |   | <--> | Uncertain |  |  |  |  |  |  |  |  | Insufficient Data |  |  |  |  |  |  |  |  |
